# Supplementary material for: Nutritional Assessment and Comparison of the Composition of Oil Extracted from Argan Nuts Collected from a Plantation and Two Natural Forest Stands of ARGAN Trees
Source: MDPI journal article supplement (doi:10.3390/f14020180), 2023-01-18
Supplement: s1 [file s1]

Archive with 1 entries (1 files):
- forests-2092796-supplementary.pdf
