# Supplementary material for: Nutritional Assessment and Comparison of the Composition of Oil Extracted from Argan Nuts Collected from a Plantation and Two Natural Forest Stands of ARGAN Trees
Source: MDPI journal article supplement (doi:10.3390/f14020180), 2023-01-18
Supplement: s1 [file s1 › forests-2092796-supplementary.pdf]

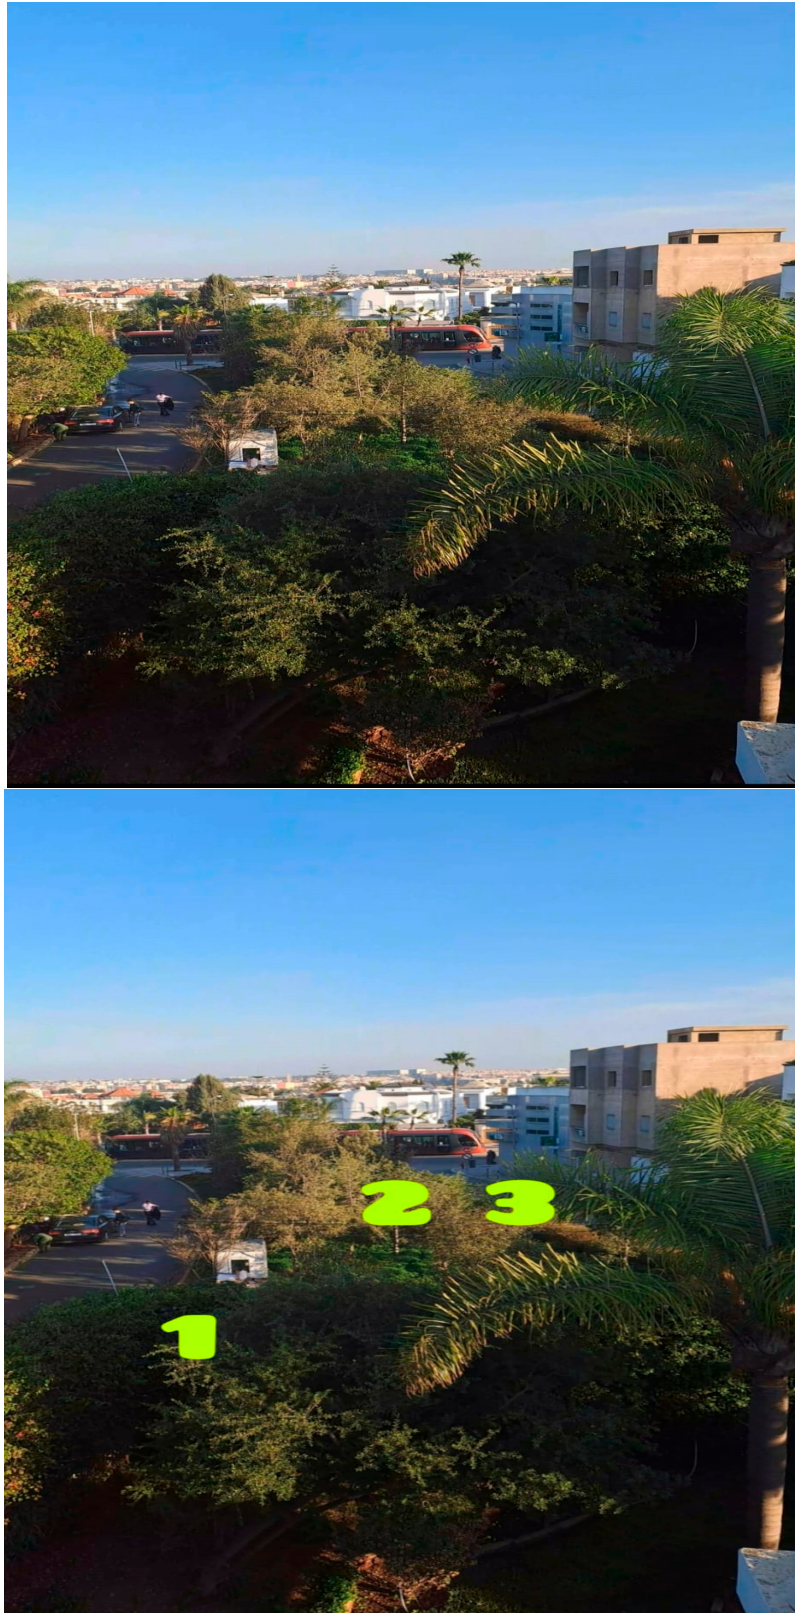

**Figure S1: Photo of the three argan trees taken from the terrace in the background tramway of Casablanca.**

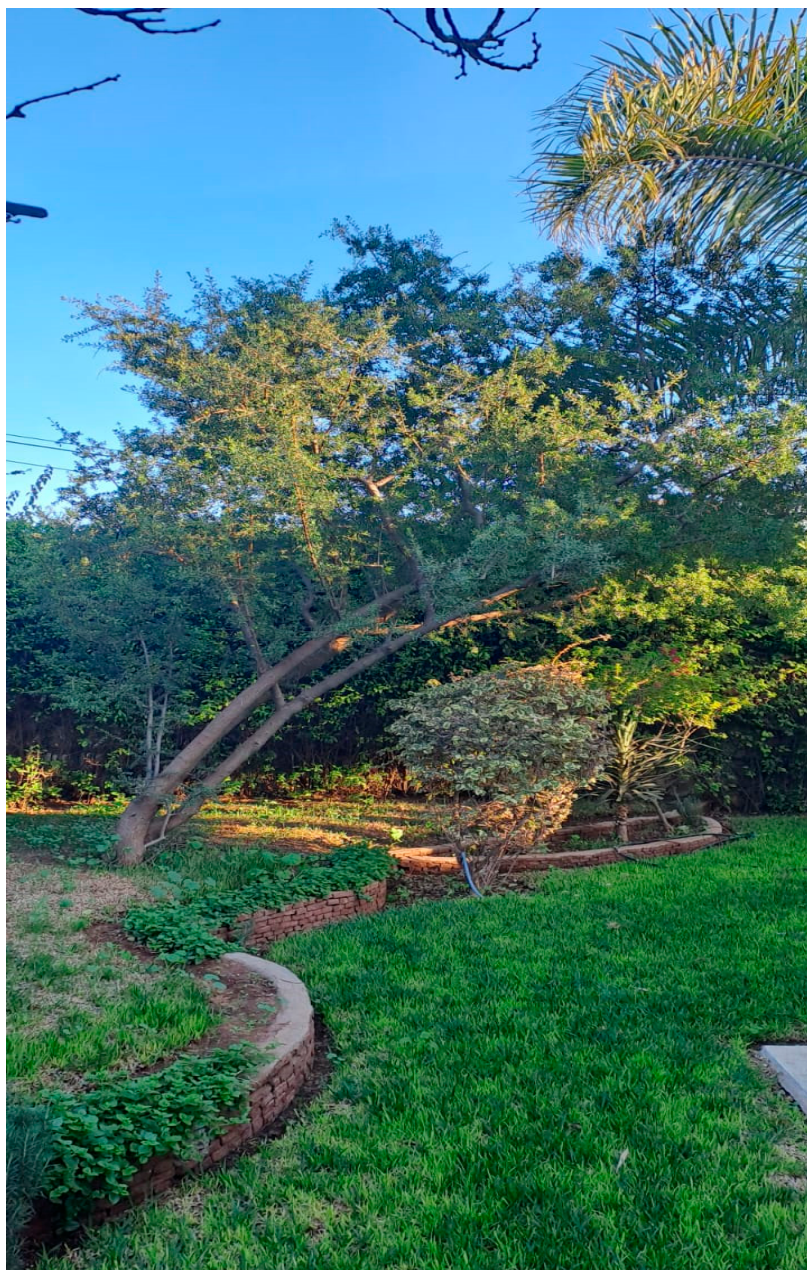

**Figure S2: Argan tree N°1**

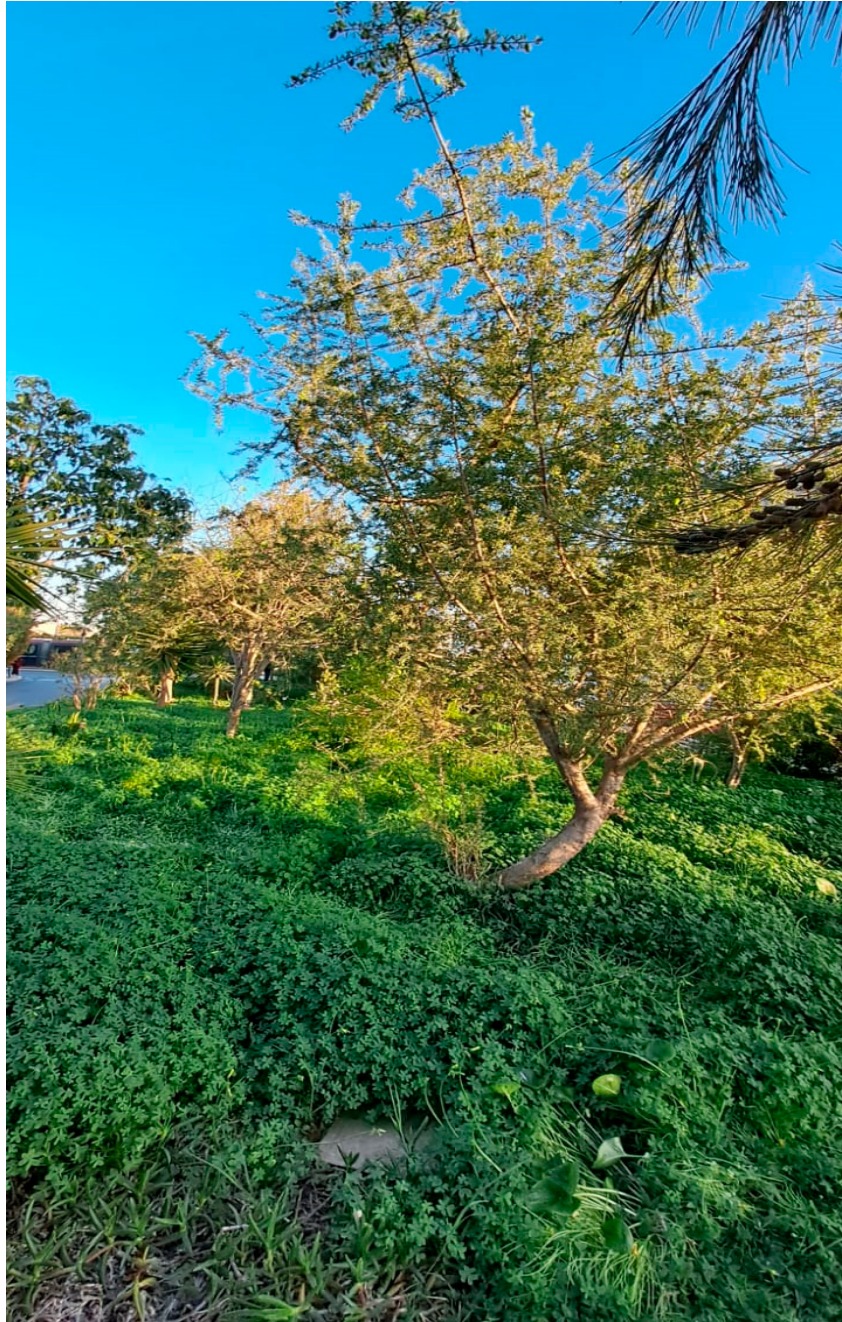

**Figure S3: Argan tree Nº2 with tramway of Casablanca in the background in left.**

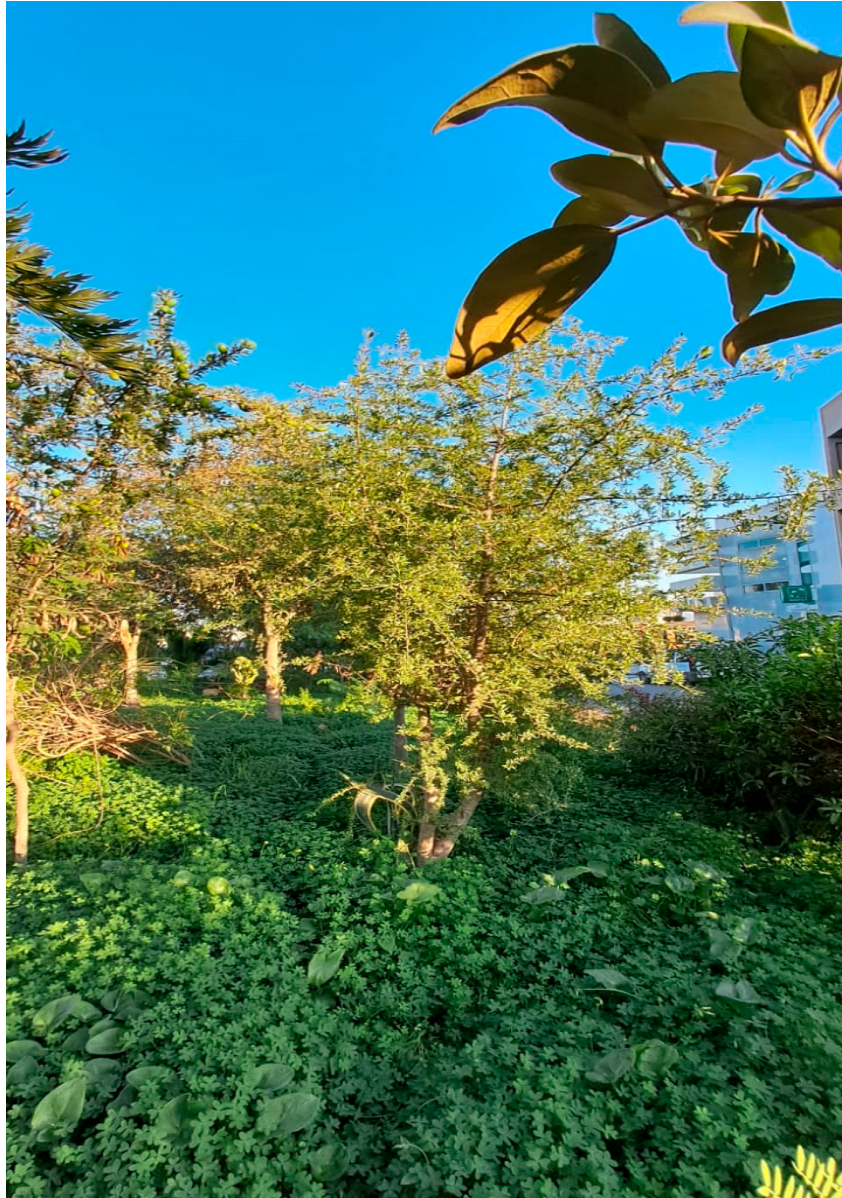

**Figure S4: Argan tree N°3 with tramway of Casablanca in the background in right.**

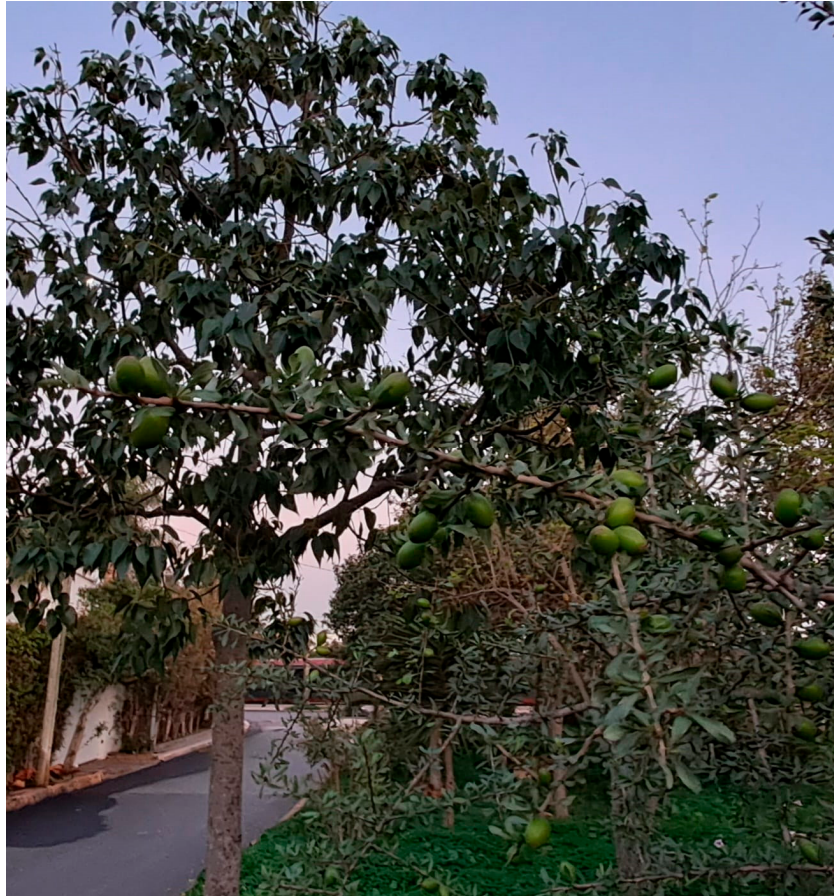

**Figure S5: Branch of argan tree planted in Casablanca with argan fruits, and the tramway of Casablanca in the background.**
